# Supplementary material for: An efficient, soluble, and recyclable multiwalled carbon nanotubes-supported TEMPO for oxidation of alcohols
Source: Royal Society of Chemistry journal article supplement (doi:10.1039/c2ra21206d), 2012-01-01

# **An Efficient, Soluble, and Recyclable Multiwalled Carbon Nanotubes-Supported TEMPO for Oxidation of Alcohols**

**Yiming Wang\*, Xiaoyu Song, Songhai Shao, Hongmin Zhong, Fei Lin**

*Address: State Key Laboratory of Fine Chemicals, Dalian University of Technology, E-330 West Campus, 2 Linggong Rd., Dalian 116024, China*

*Email: [chemwym@dlut.edu.cn](mailto:chemwym@dlut.edu.cn)*

- 1. The XPS N1s peaks of the MWNTs-TEMPO.....s2**
- 2. <sup>1</sup>H NMR spectra of aldehyde.....s3**

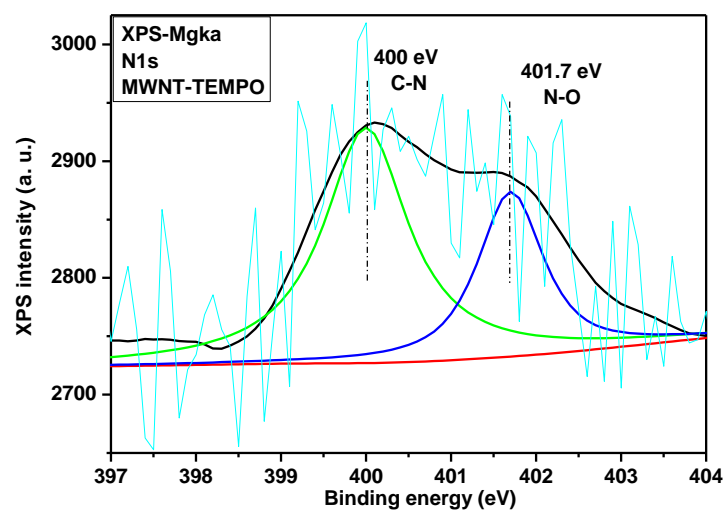

**Figure S1.** Deconvolution of the XPS N1s peaks of the MWNTs-TEMPO.

Deconvolution of the XPS N1s peak confirmed the presence of nitroxid functions onto the MWNTs surface at 400 eV. A peak at 400 eV is assigned to C-N, the other is correspond to N-O (401.7 eV).

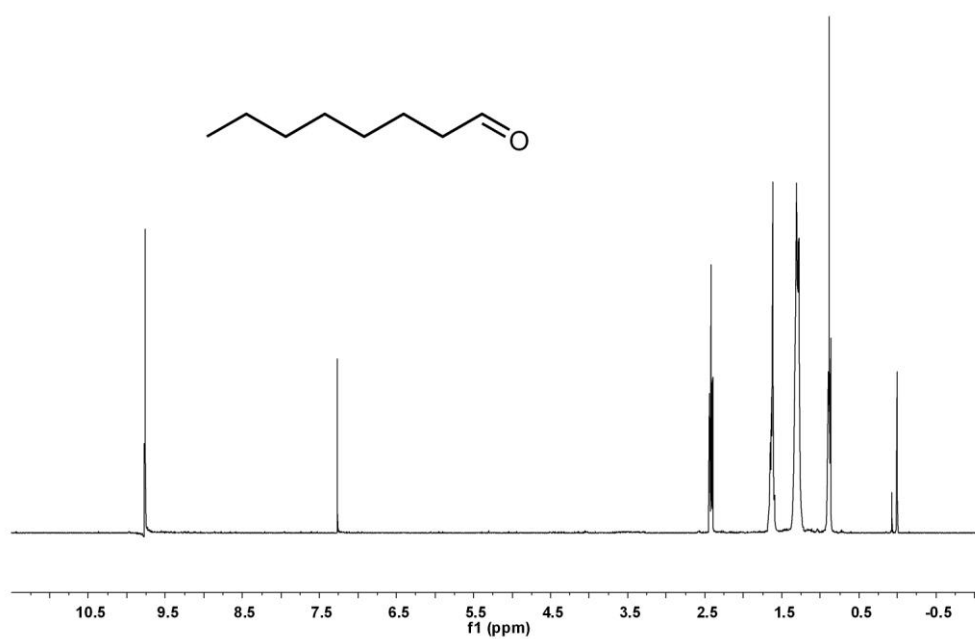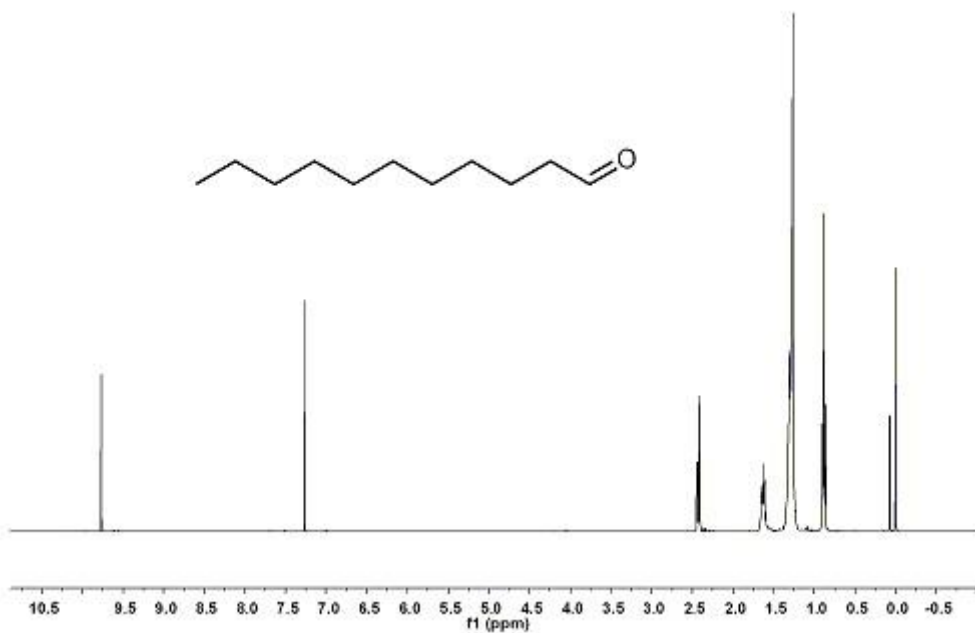

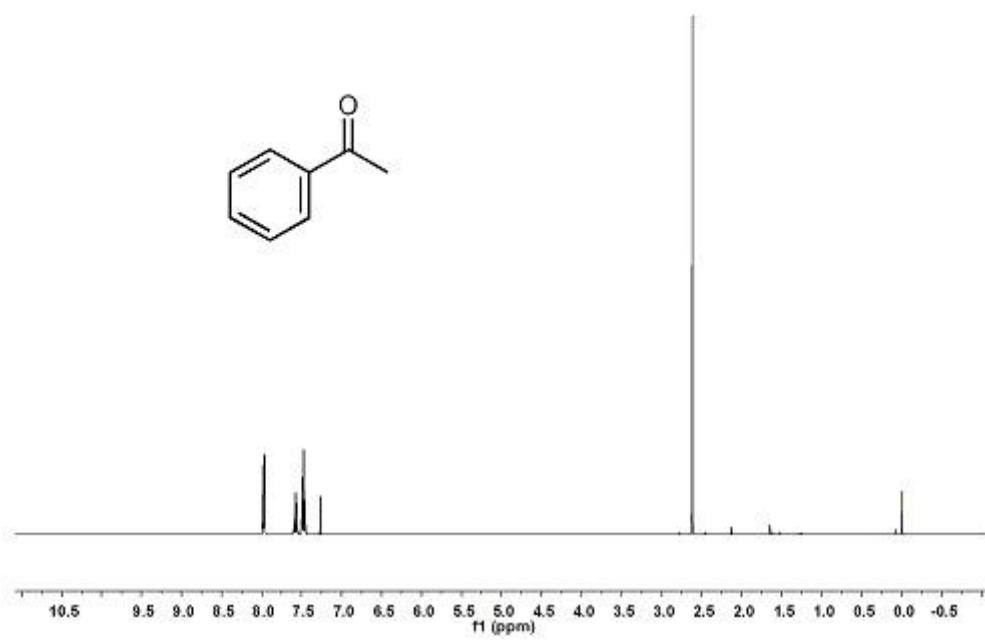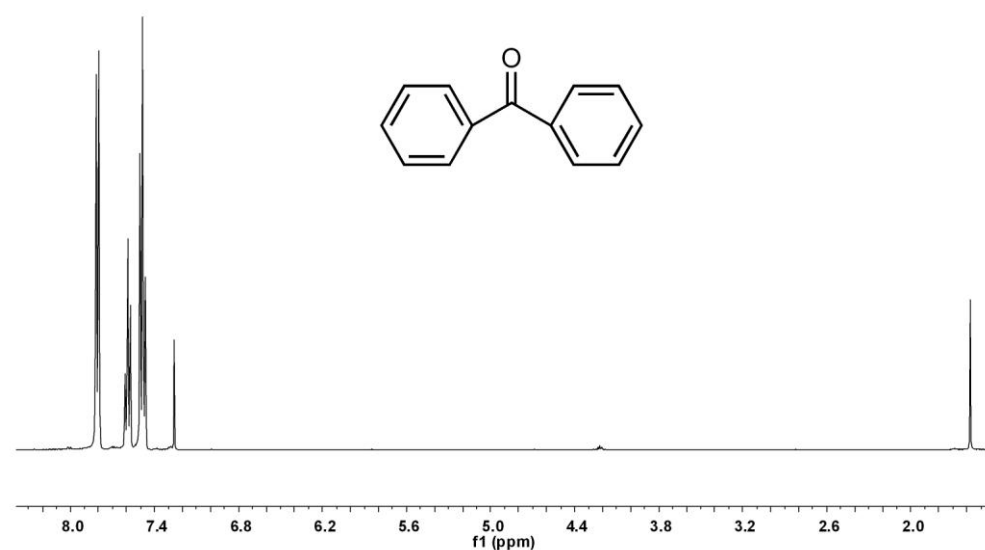

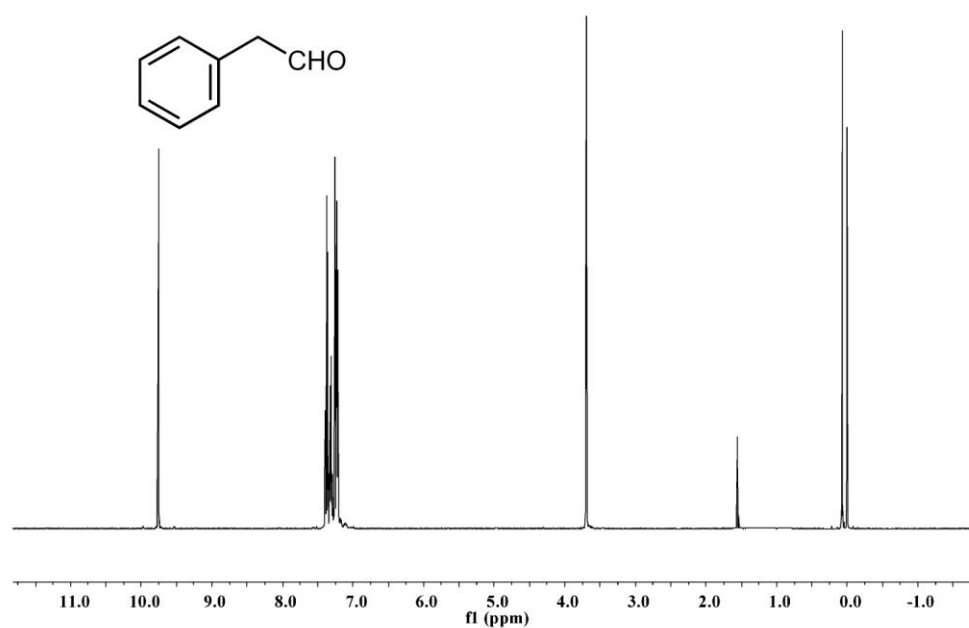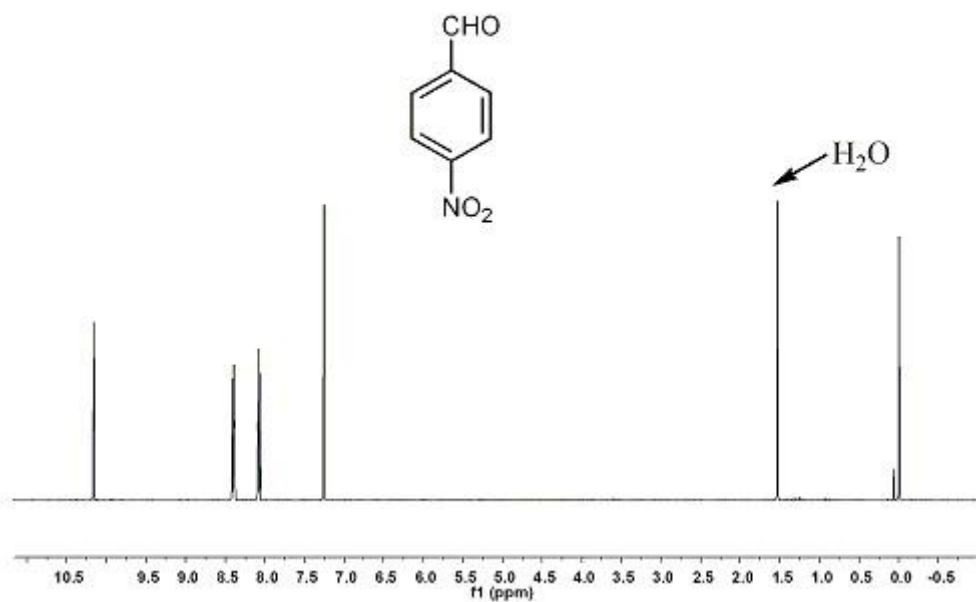

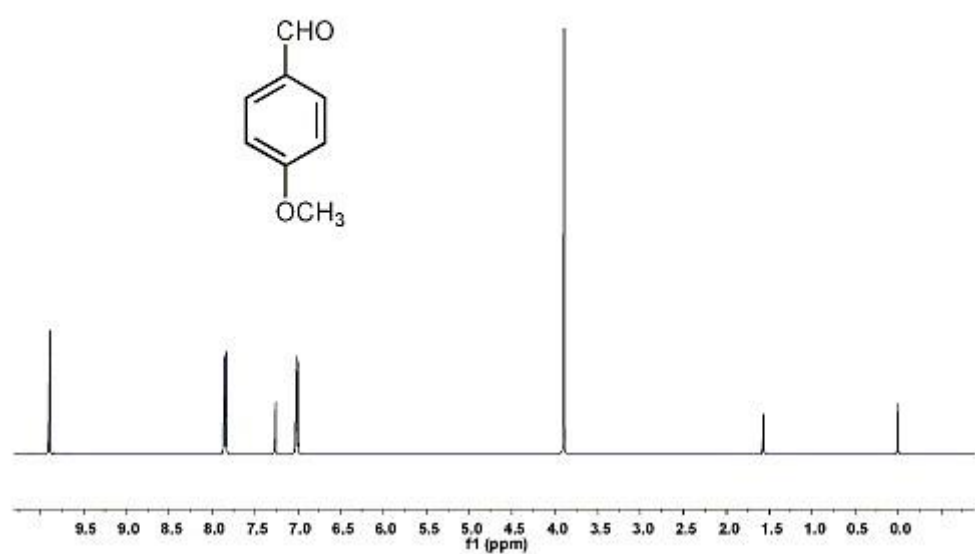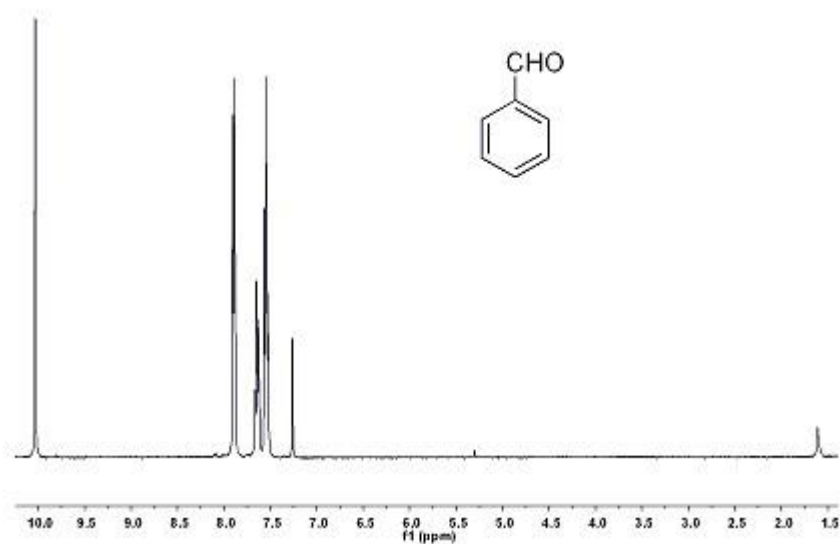

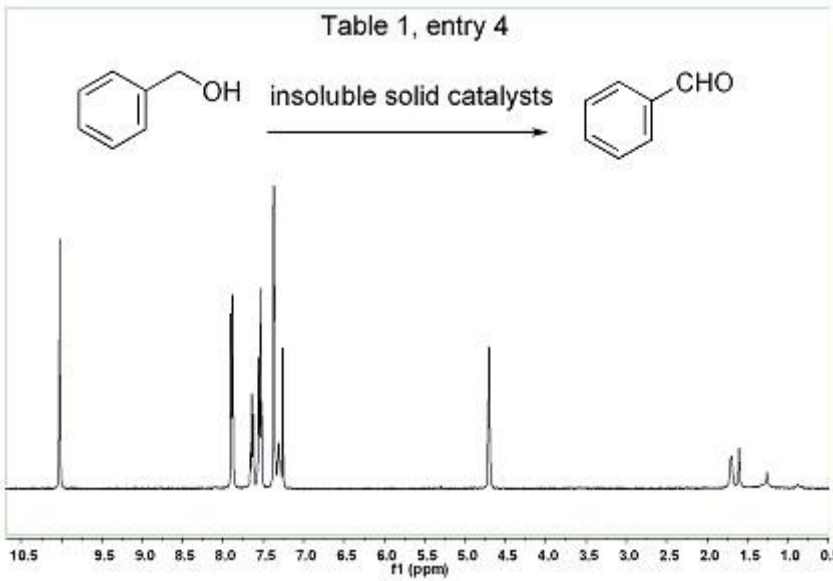

Supplement: c2ra21206d.pdf [file c2ra21206d.pdf]
